# Supplementary material
Source: publisher figshare collection journal article supplement (https://sage.figshare.com/ndownloader/files/16752362)
Supplement: Supplementary file 1 [file 16752362]

**Supplemental Figure Caption.** Care activities required for surgical clearance included development of a peri-operative care plan, referrals, communications with providers, and radiographic/laboratory testing. Shown are the percentages of all care activities associated with each organ system (e.g., 38% of all care activities were associated with clinical work to optimize the children's neurologic health).

**Supplemental Figure. Organ Systems Associated with Last-Minute, Care Activities Performed During the Pre-Anesthetic Evaluation for Children with Neuromuscular Scoliosis Undergoing Spinal Fusion**

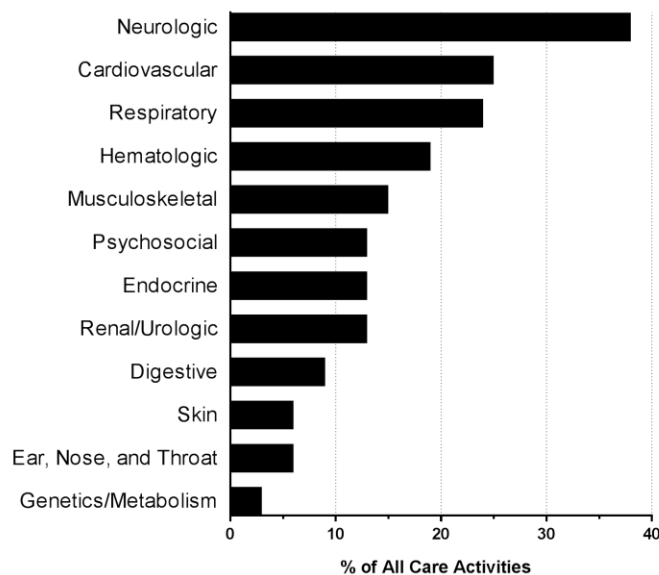

**Figure Caption.** Care activities required for surgical clearance included development of a peri-operative care plan, referrals, communications with providers, and radiographic/laboratory testing. Shown are the percentages of all care activities associated with each organ system (e.g., 38% of all care activities were associated with clinical work to optimize the children's neurologic health).
